# Supplementary material for: Combining gut microbiota modulation and chemotherapy by capecitabine-loaded prebiotic nanoparticle improves colorectal cancer therapy
Source: PubMed Central journal article supplement (PMC10406894; doi:10.1038/s41467-023-40439-y), 2023-08-07
Supplement: 41467_2023_40439_MOESM1_ESM.pdf [file 41467_2023_40439_MOESM1_ESM.pdf]

## Supplementary Information for:

# Combining gut microbiota modulation and chemotherapy by capecitabine-loaded prebiotic nanoparticle improves colorectal cancer therapy

Tianqun Lang<sup>1,2,#</sup>, Runqi Zhu<sup>1,3,#</sup>, Xiao Zhu<sup>1,3</sup>, Wenlu Yan<sup>1,3</sup>, Yu Li<sup>4</sup>, Yihui Zhai<sup>1,3</sup>, Ting Wu<sup>5</sup>, Xin Huang<sup>1,3</sup>, Qi Yin<sup>1,2,3★</sup>, Yaping Li<sup>1,2,3,4,6★</sup>

<sup>1</sup> State Key Laboratory of Drug Research & Center of Pharmaceutics, Shanghai Institute of Materia Medica, Chinese Academy of Sciences, Shanghai 201203, China

<sup>2</sup> Yantai Key Laboratory of Nanomedicine & Advanced Preparations, Yantai Institute of Materia Medica, Shandong 264000, China

<sup>3</sup> University of Chinese Academy of Sciences, Beijing 100049, China

<sup>4</sup> School of Chinese Materia Medica, Nanjing University of Chinese Medicine, Nanjing 210023, China

<sup>5</sup> Department of Pharmaceutics, School of Pharmacy, Nanjing Medical University, Nanjing 211116, China

<sup>6</sup> Shandong Laboratory of Yantai Drug Discovery, Bohai rim Advanced Research Institute for Drug Discovery, Yantai 264117, China

# These authors contributed equally: Tianqun Lang, Runqi Zhu

[★] Corresponding authors: Prof. Qi Yin (qyin@simm.ac.cn); Prof. Yaping Li (ypli@simm.ac.cn);  
Tel/Fax: +86-21-2023-1979.

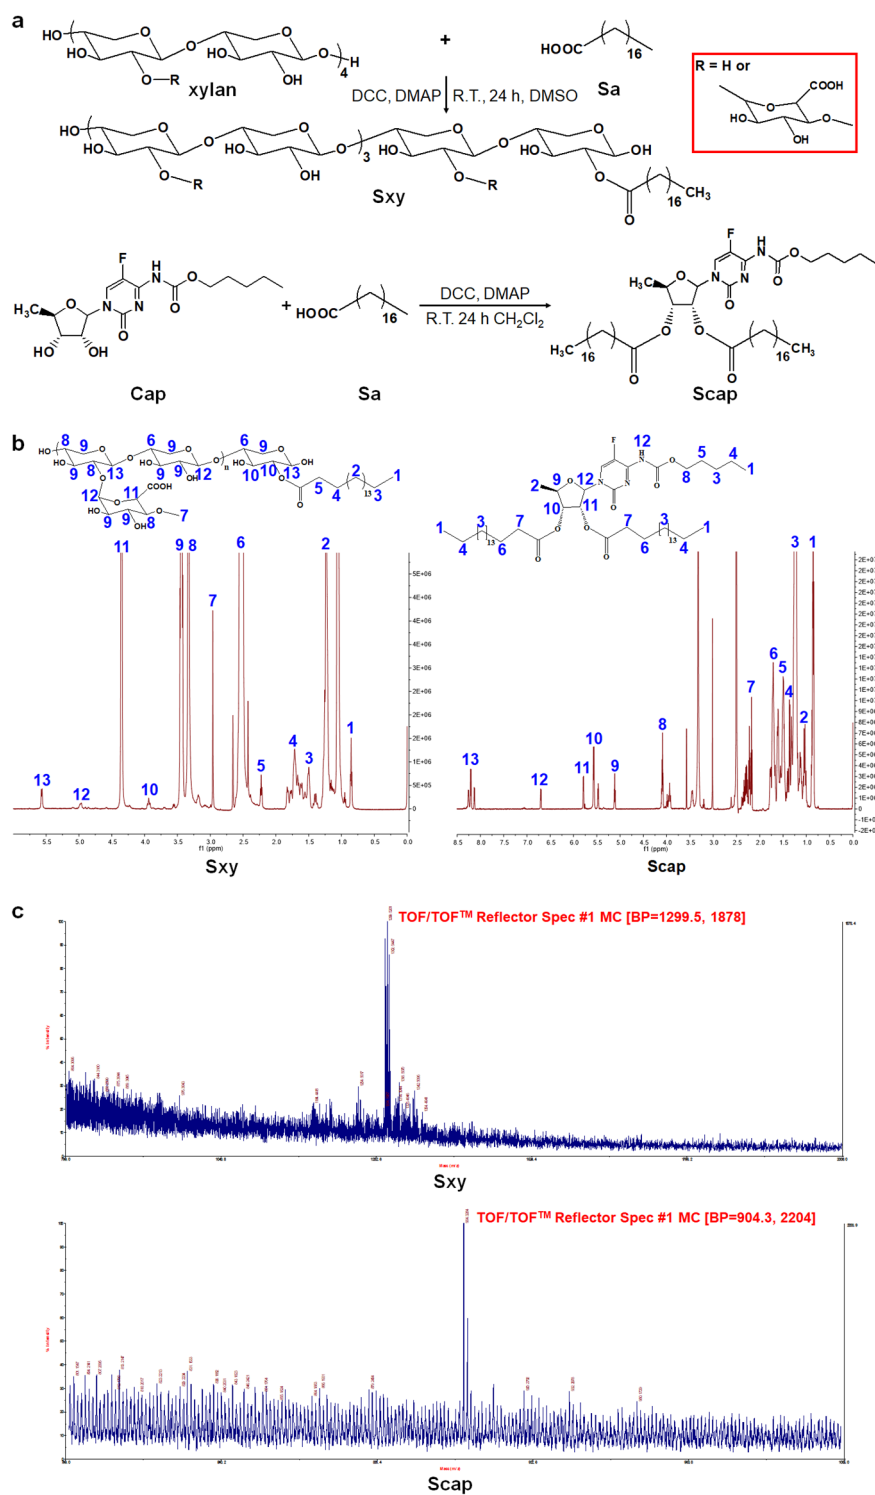

**Supplementary Figure 1.** Synthesis and structure confirmation of Sxy and Scap. **a**, The diagram of the synthesis of Sxy and Scap. **b**, The  $^1\text{H}$  NMR spectra of Sxy and Scap. **c**, The MALDI-TOF-MS spectra of Sxy and Scap.

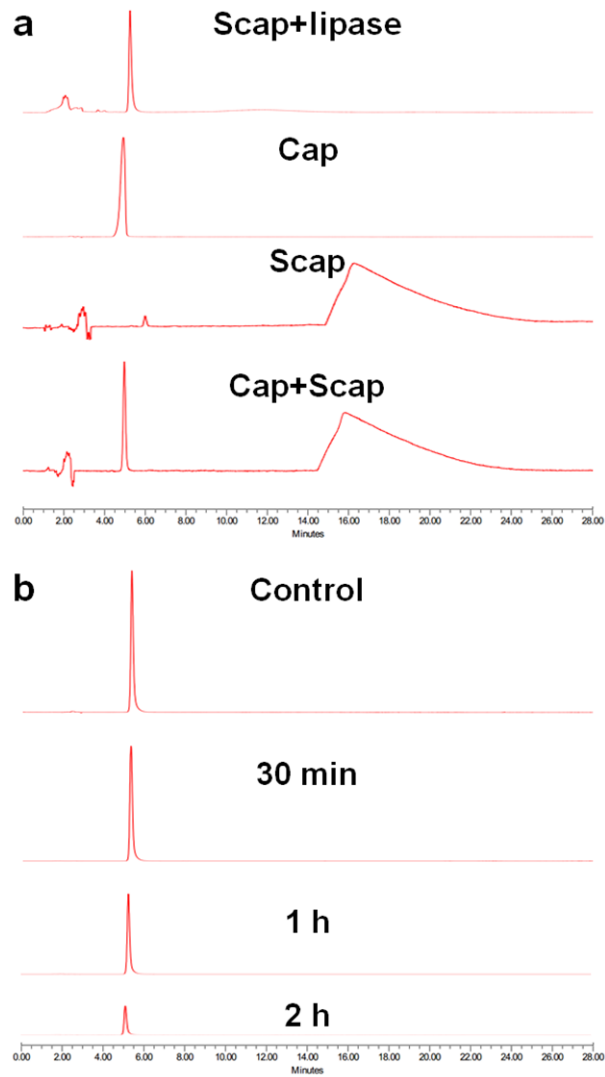

**Supplementary Figure 2.** Hydrolysis of Scap. **a**, The spectra of Scap after or before incubation with lipase, Cap, and Cap+Scap mixture detected by HPLC. **b**, The spectra of liver extracts taken from the mice at 30 min, 1 h, and 2 h post oral administration with Scap. The Cap solution mixed with the liver extract from the untreated mice was detected as control.

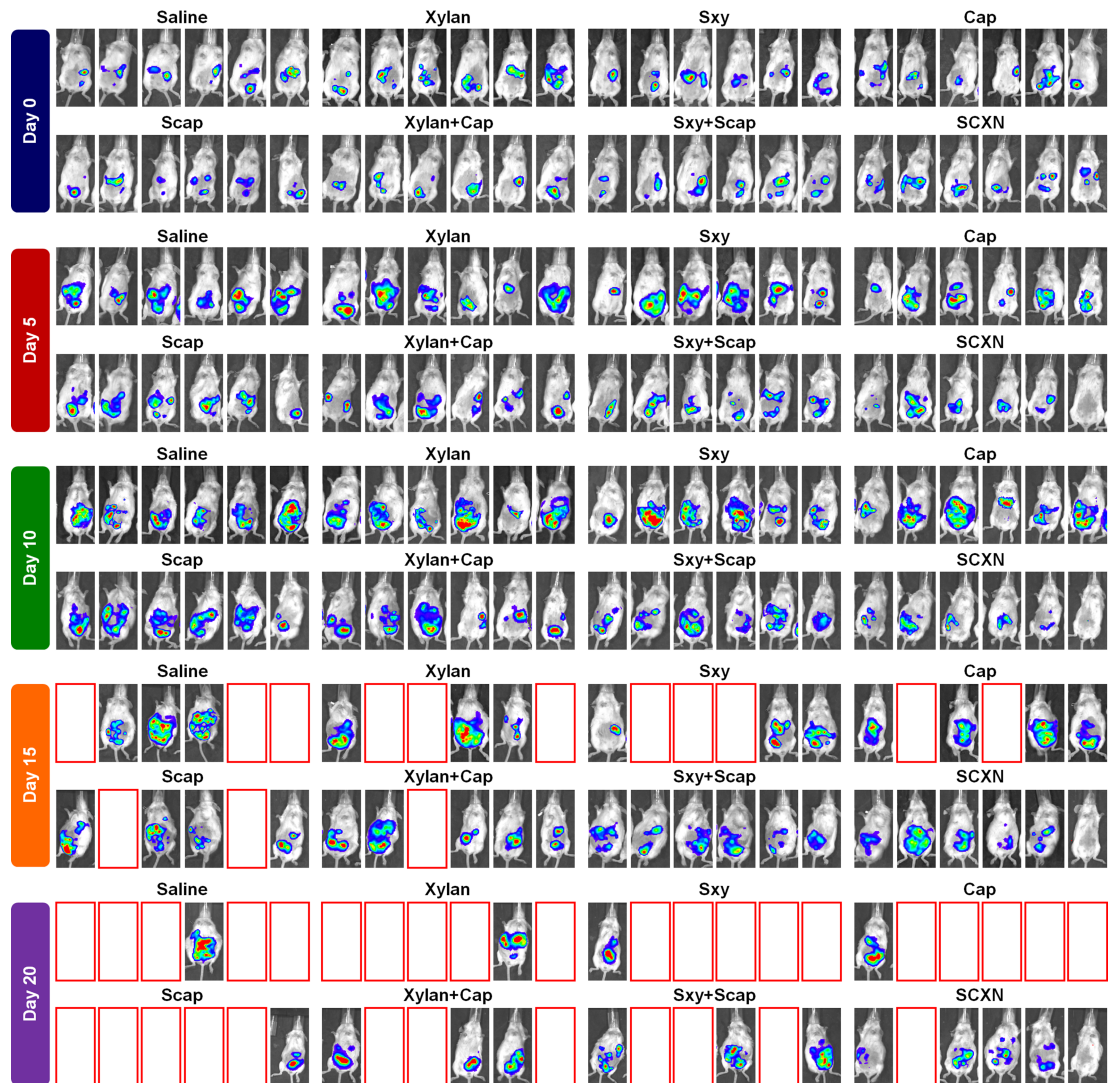

**Supplementary Figure 3.** In vivo bioluminescence imaging of CT26-luc tumor-bearing mice receiving mutli-dose of different formulations. n = 6 mice.

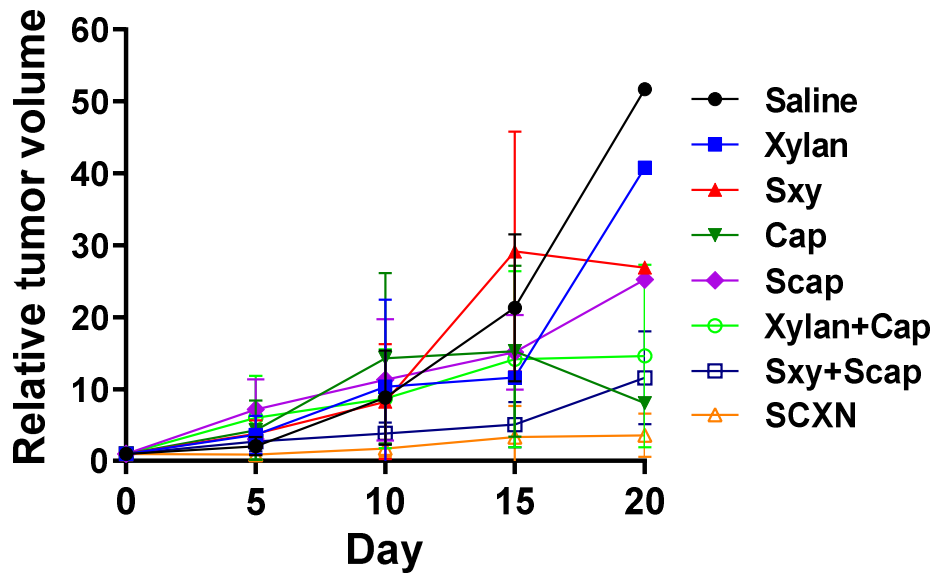

**Supplementary Figure 4.** The variation of relative tumor volumes in the CT26-luc tumor-bearing mice calculated according to the photons amount detected by IVIS during the therapy period. Data are shown as mean  $\pm$  SD. n equals to the number of surviving mice in each group, of which the maximum value is 6. On day 15, n = 3 for Saline, Xylan and Sxy group, n = 4 for Cap and Scap group, n = 5 for Xylan+Cap group; On day 20, n=1 for Saline, Xylan, Sxy, Cap and Scap group, n = 3 for Xylan+Cap and Sxy+Scap group, n=5 for SCXN group. For all of other points, n = 6. Source data are provided as a Source Data file.

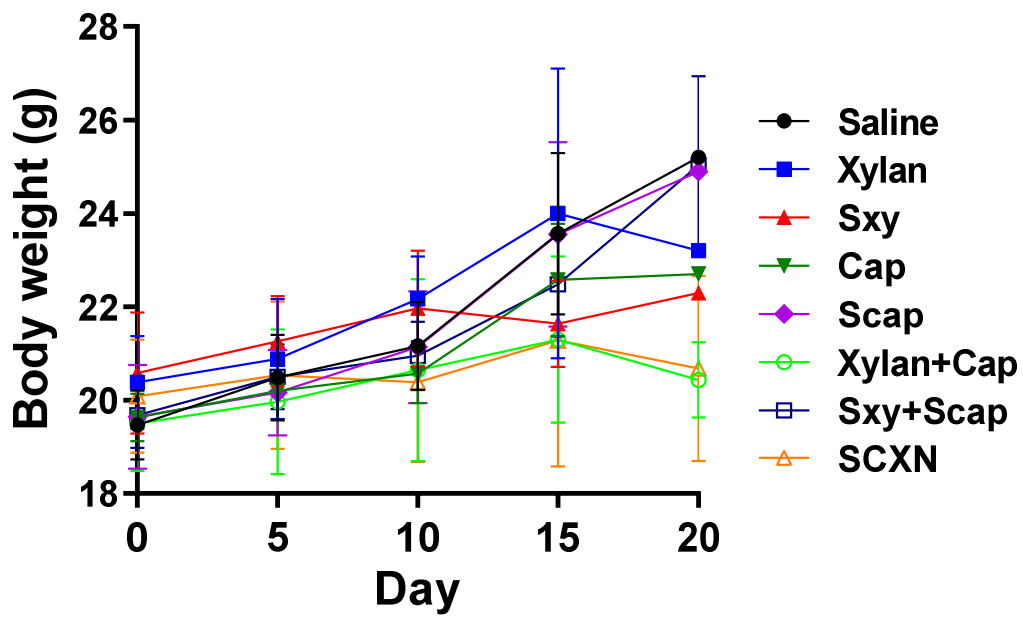

**Supplementary Figure 5.** The variation of average body weights of the CT26-luc tumor-bearing mice during the therapy period. Data are shown as mean  $\pm$  SD. n equals to the number of surviving mice in each group, of which the maximum value is 6. On day 15, n = 3 for Saline, Xylan and Sxy group, n = 4 for Cap and Scap group, n = 5 for Xylan+Cap group; On day 20, n=1 for Saline, Xylan, Sxy, Cap and Scap group, n = 3 for Xylan+Cap and Sxy+Scap group, n=5 for SCXN group. For all of other points, n = 6. Source data are provided as a Source Data file.

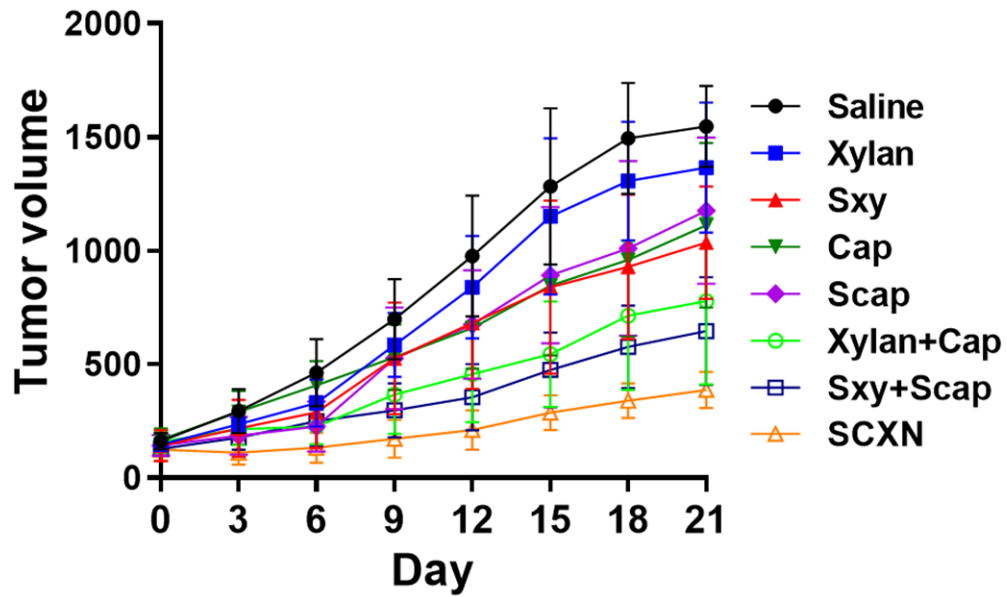

**Supplementary Figure 6.** The variation of average tumor volumes in the MC38 tumor-bearing mice during the therapy period. Data are shown as mean  $\pm$  SD (n = 6 mice). Source data are provided as a Source Data file.

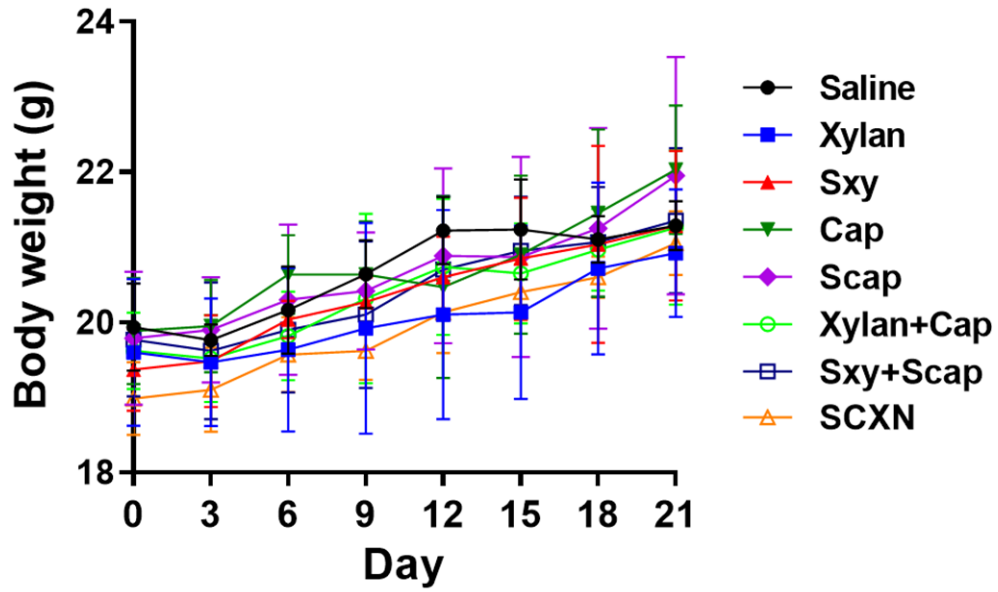

**Supplementary Figure 7.** The variation of average body weights of the MC38 tumor-bearing mice during the therapy period. Data are shown as mean  $\pm$  SD (n = 6 mice).

Source data are provided as a Source Data file.



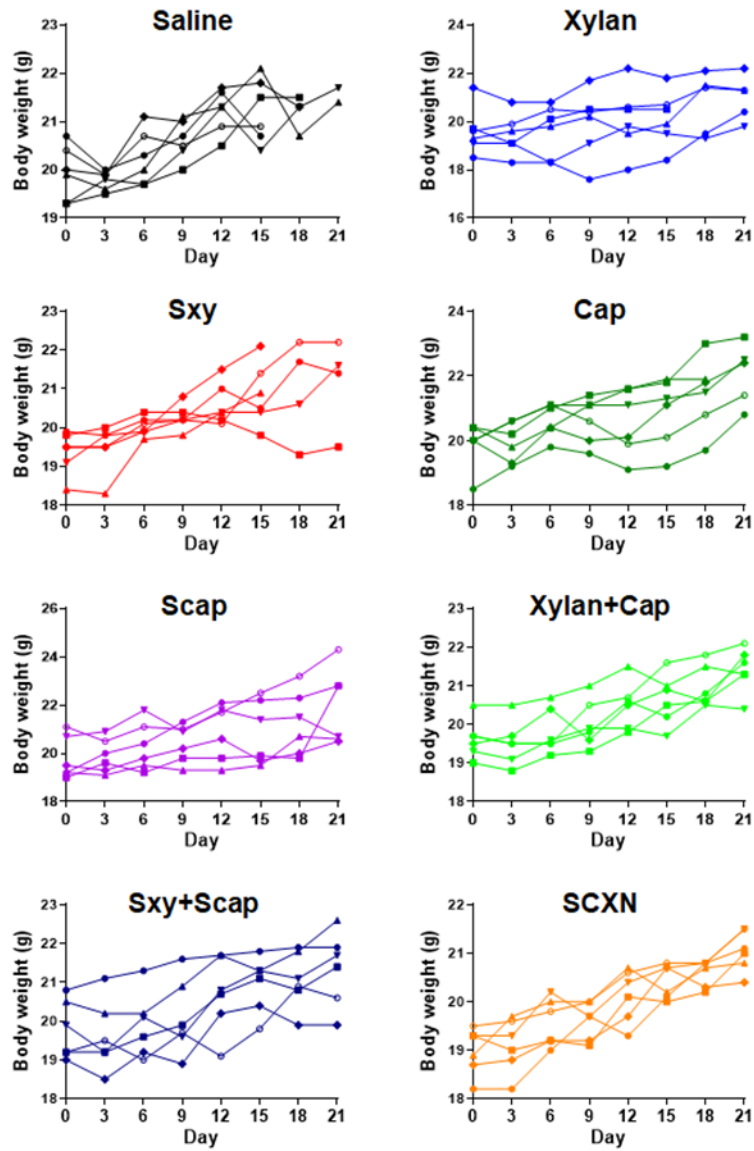

**Supplementary Figure 8.** The variation of body weight of each MC38 tumor-bearing mouse during the therapy period. n = 6 mice. Source data are provided as a Source Data file.

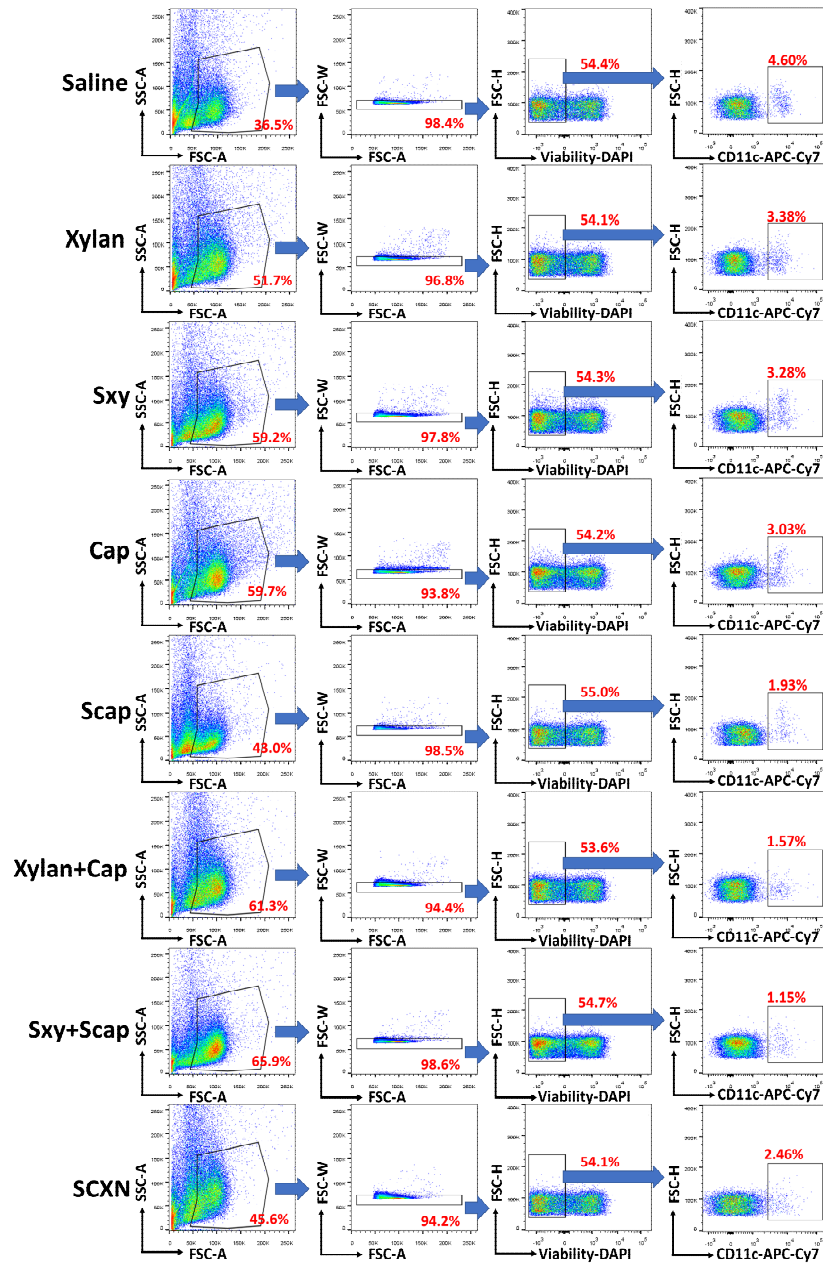

**Supplementary Figure 9.** The gating strategy for CD11c<sup>+</sup> cells in the draining lymph nodes of the CT26 tumor-bearing mice.

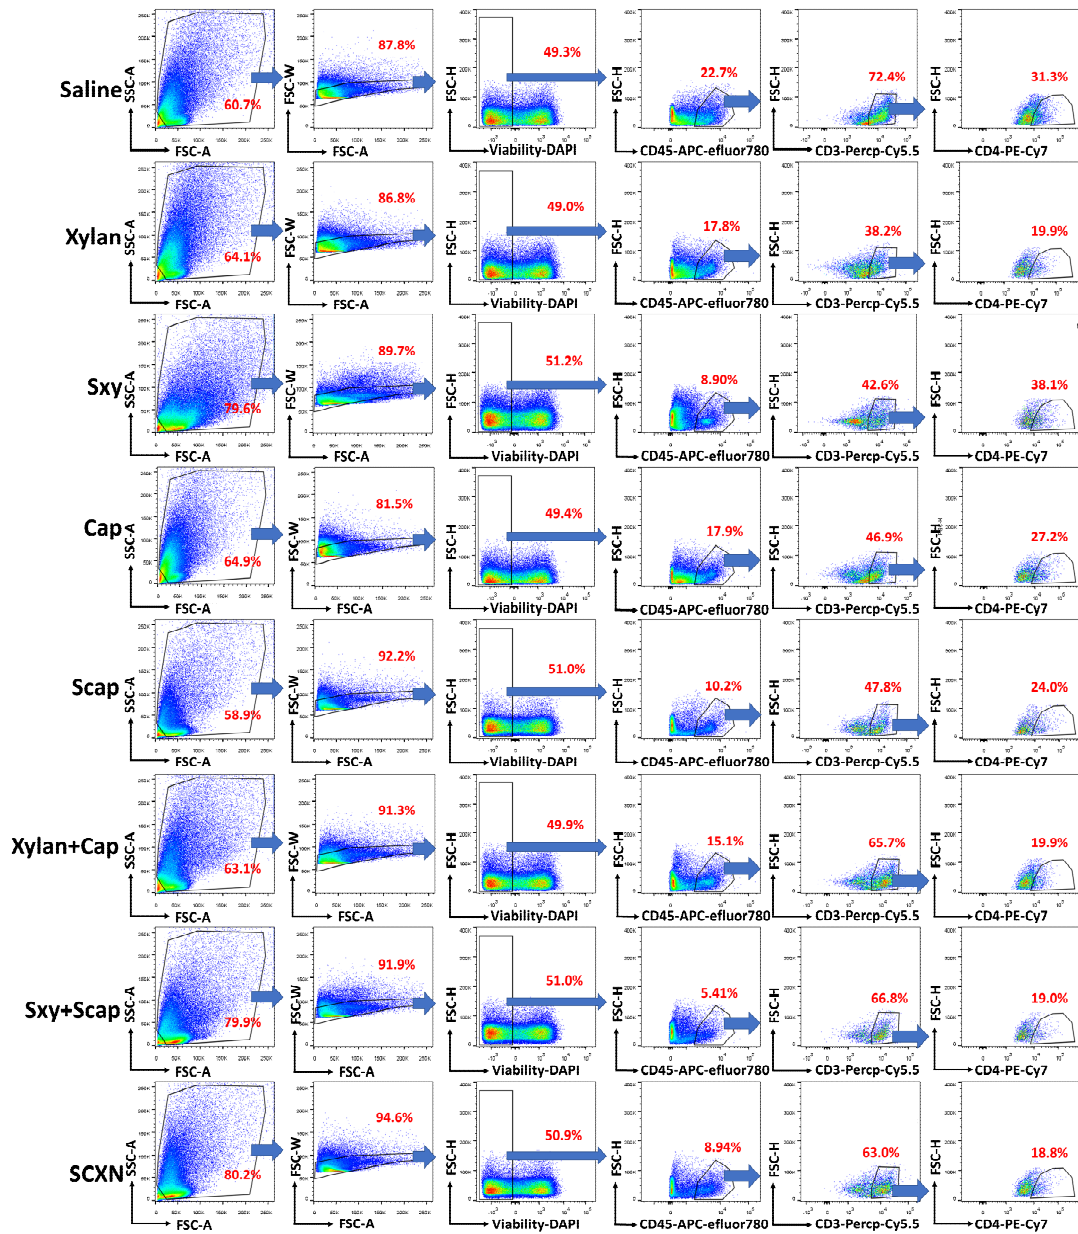

**Supplementary Figure 10.** The gating strategy for CD3<sup>+</sup> and CD4<sup>+</sup> cells in the tumors of the CT26 tumor-bearing mice.

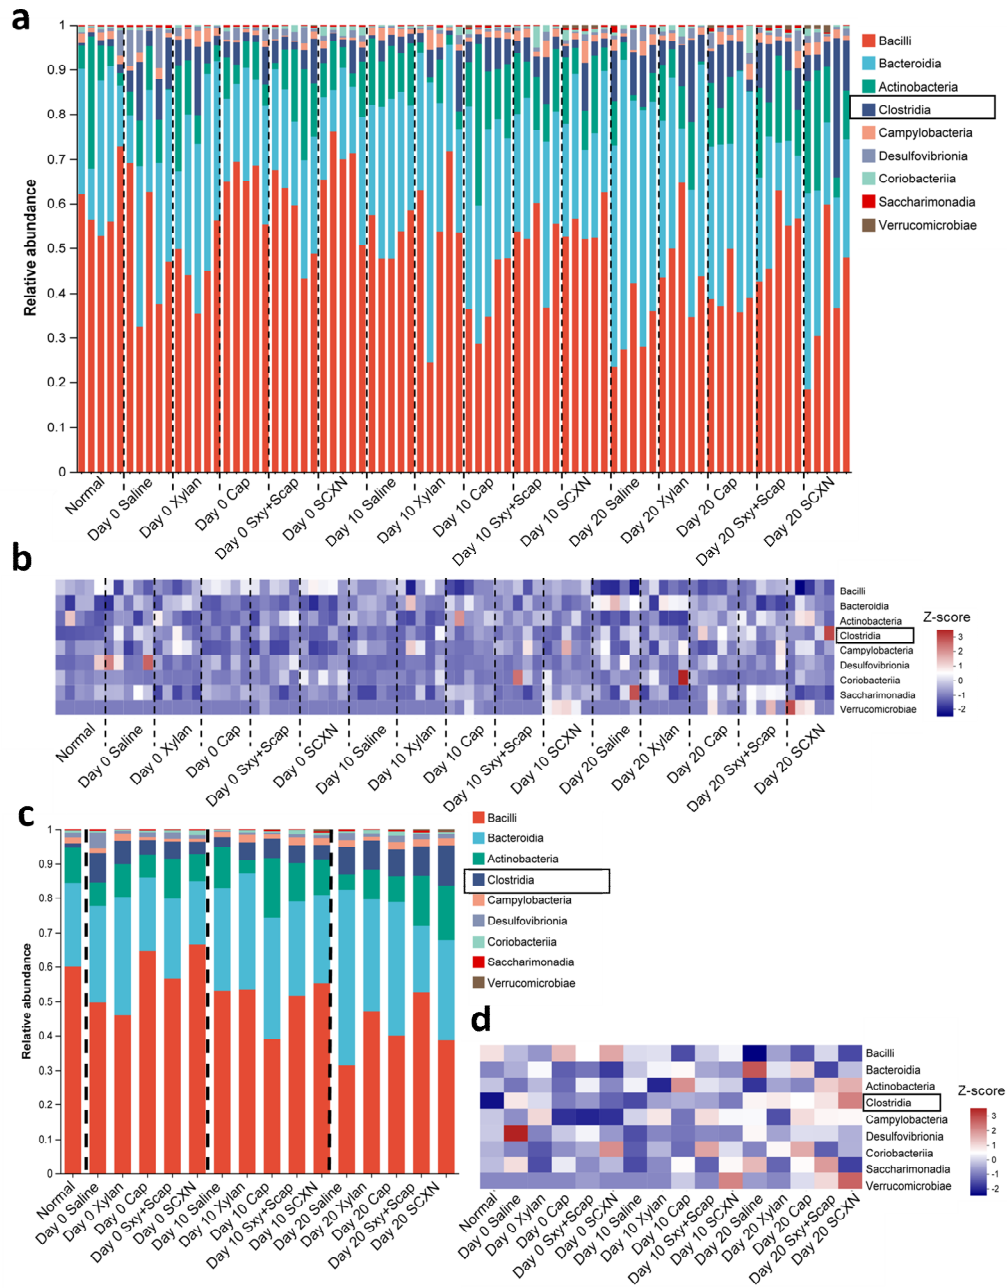

**Supplementary Figure 11.** The relative abundance at the class level of the intestine microbial community in CT-26 tumor-bearing mice receiving multi-dose of different formulations. **a, b**, Barplot (a) and heatmap (b) of samples from individual mice. **c, d**, Barplot (c) and heatmap (d) of samples from each group.  $n = 5$  mice. Source data are provided as a Source Data file.

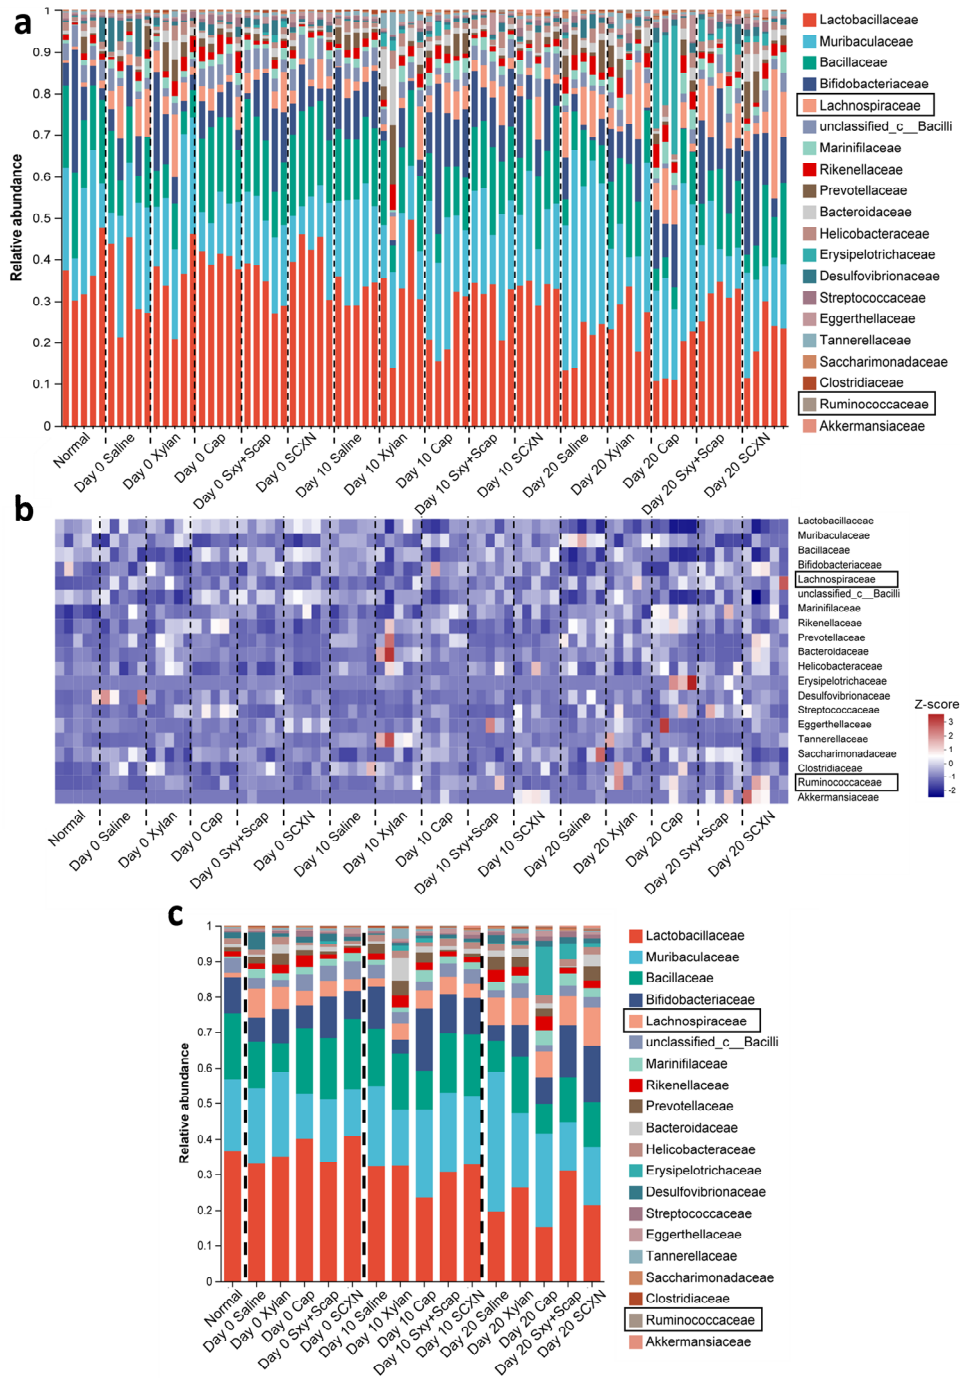

**Supplementary Figure 12.** The relative abundance at the family level of the intestine microbial community in CT-26 tumor-bearing mice receiving multi-dose of different formulations. **a, b**, Barplot (a) and heatmap (b) of samples from individual mice. **c**, Barplot of samples from each group. n = 5 mice. Source data are provided as a Source Data file.



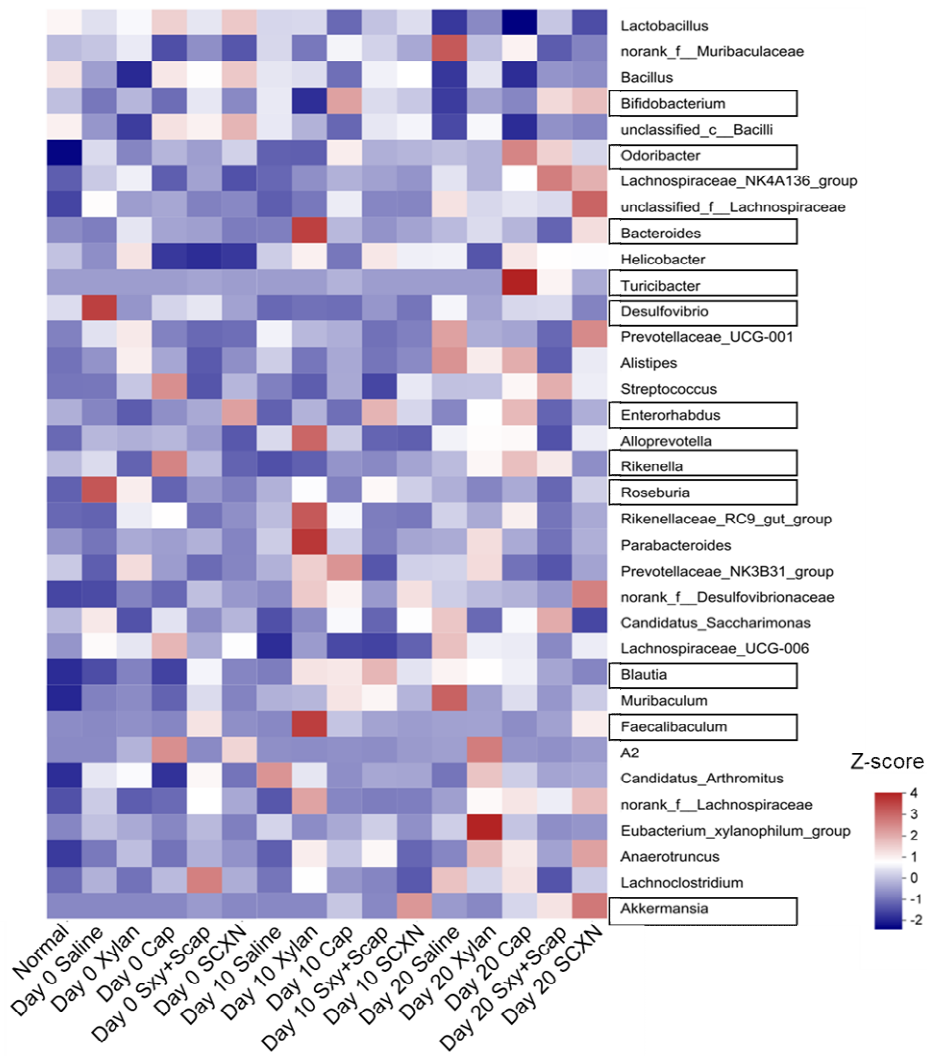

**Supplementary Figure 14.** Heatmap showing average relative abundance of the intestine microbial community at the genus level in CT-26 tumor-bearing mice receiving multi-dose of different formulations. n = 5 mice. Source data are provided as a Source Data file.

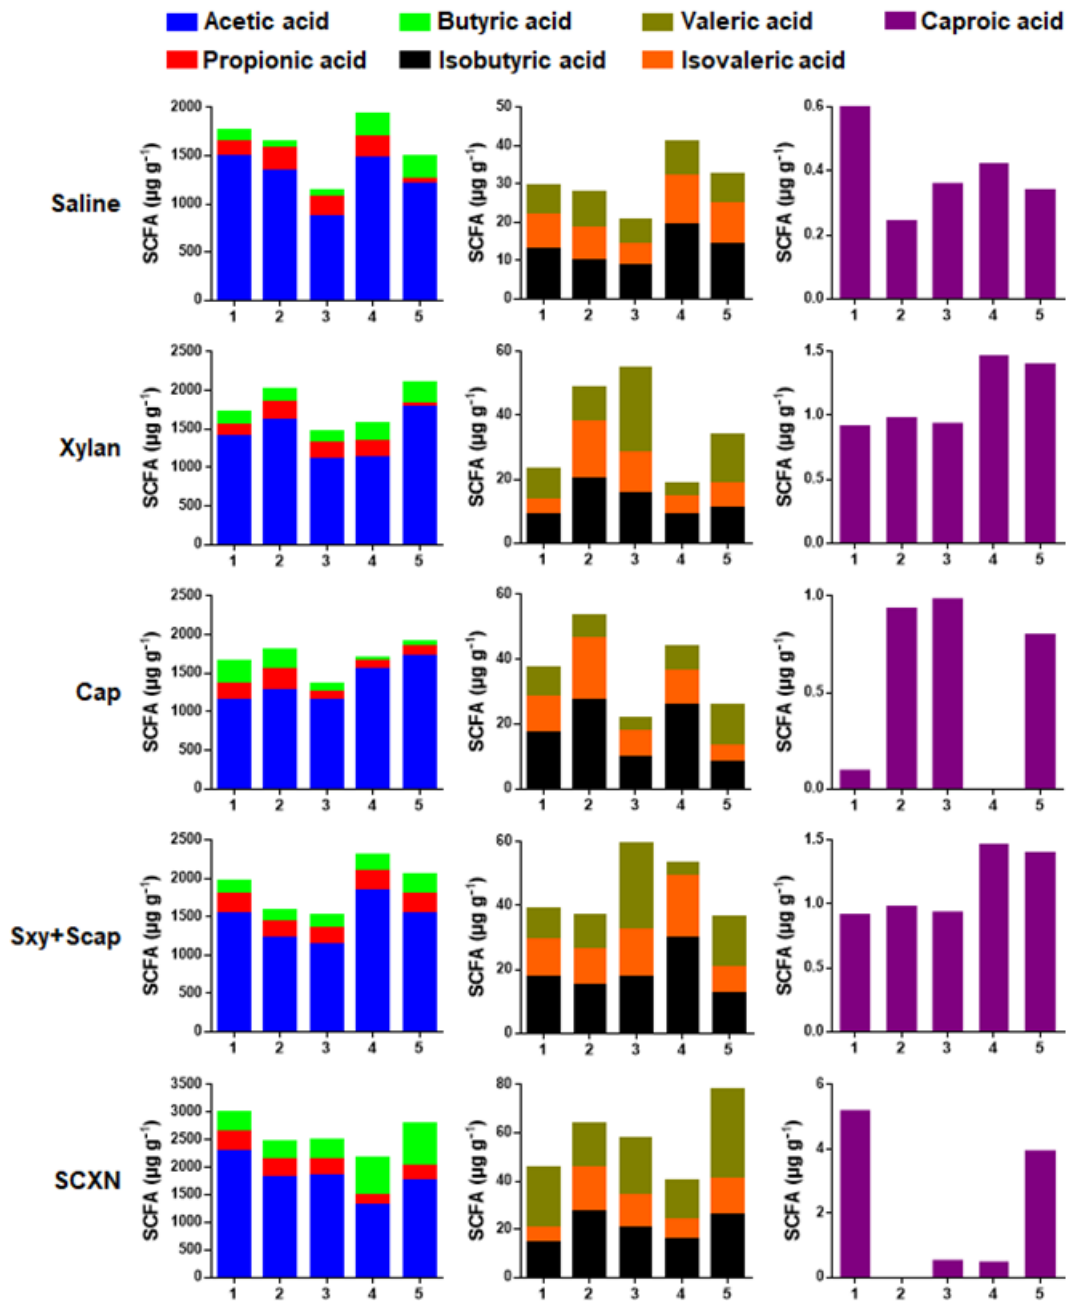

**Supplementary Figure 15.** SCFA levels in the faeces from individual CT-26 tumor-bearing mice receiving multi-dose of different formulations.  $n = 5$  mice. Source data are provided as a Source Data file.



**Supplementary Table 1.** Pharmacokinetic parameters of Cap in mice after orally administrated with free Cap and SCXN at the dose of 100 mg kg<sup>-1</sup> Cap. n = 3 mice.

| <b>Parameter</b>                                        | <b>Cap</b> | <b>SCXN</b> |
|---------------------------------------------------------|------------|-------------|
| C <sub>max</sub> (μg mL <sup>-1</sup> )                 | 2.90±0.25  | 4.19±0.36   |
| T <sub>1/2</sub> (h)                                    | 2.48±0.09  | 6.78±1.08   |
| MRT <sub>(0-∞)</sub> (h)                                | 3.59±0.25  | 7.94±0.33   |
| AUC <sub>(0-t)</sub> (h·μg mL <sup>-1</sup> )           | 9.98±0.92  | 22.45±1.30  |
| AUC <sub>(0-∞)</sub> (h·μg mL <sup>-1</sup> )           | 10.44±0.90 | 24.11±1.06  |
| Plasma clearance (mL h <sup>-1</sup> kg <sup>-1</sup> ) | 64.10±5.82 | 27.68±1.53  |

**Supplementary Table 2.** Hematological parameters of the blood collected from mice treated with multi-dose of saline, xylan, Sxy, Cap, Scap, xylan+Cap, Sxy+Scap, or SCXN. n = 3 mice.

| <b>Group</b> | <b>RBC</b><br>[10 <sup>12</sup> L <sup>-1</sup> ] <sup>a</sup> | <b>WBC</b><br>[10 <sup>9</sup> L <sup>-1</sup> ] <sup>b</sup> | <b>PLT</b><br>[10 <sup>9</sup> L <sup>-1</sup> ] <sup>c</sup> | <b>GRAN</b><br>[10 <sup>9</sup> L <sup>-1</sup> ] <sup>d</sup> | <b>RDW</b><br>[%] <sup>e</sup> | <b>MCV</b><br>[fL] <sup>f</sup> |
|--------------|----------------------------------------------------------------|---------------------------------------------------------------|---------------------------------------------------------------|----------------------------------------------------------------|--------------------------------|---------------------------------|
| Saline       | 6.52±0.55                                                      | 3.43±1.10                                                     | 446.33±78.49                                                  | 1.00±0.29                                                      | 14.40±0.46                     | 49.00±1.41                      |
| Xylan        | 6.84±0.32                                                      | 3.93±2.21                                                     | 409.00±58.39                                                  | 0.87±0.09                                                      | 15.77±2.28                     | 46.43±1.19                      |
| Sxy          | 8.02±0.51                                                      | 4.50±0.43                                                     | 595.00±104.10                                                 | 1.17±0.09                                                      | 14.80±0.75                     | 48.17±1.17                      |
| Cap          | 5.95±0.81                                                      | 3.73±1.43                                                     | 624.67±246.29                                                 | 0.77±0.45                                                      | 17.20±4.86                     | 45.77±5.78                      |
| Scap         | 5.77±1.49                                                      | 2.37±1.05                                                     | 402.33±153.02                                                 | 1.03±0.45                                                      | 15.57±1.32                     | 47.10±2.26                      |
| Xylan+Cap    | 7.42±0.27                                                      | 2.30±0.53                                                     | 429.67±57.57                                                  | 0.8±0.1                                                        | 21.03±9.59                     | 44.60±6.18                      |
| Sxy+Scap     | 7.52±0.38                                                      | 4.30±1.18                                                     | 402.33±114.75                                                 | 1.23±0.35                                                      | 17.70±5.34                     | 47.10±6.93                      |
| SCXN         | 8.05±0.25                                                      | 4.20±0.69                                                     | 571.33±108.15                                                 | 1.20±0.40                                                      | 14.40±0.51                     | 49.73±0.71                      |

a: red blood cells;

b: white blood cells;

c: platelets;

d: granulocytes

e: red cell distribution width;

f: mean corpuscular volume.
